# Supplementary material for: Trop-2 governs anti-metastatic desmosomal integrity
Source: Research Square preprint supplement (doi:10.21203/rs.3.rs-6123457/v1), 2025-07-17
Supplement: Supplementary file 1 [file bcf9509110d2a1f84b049146.docx]

**Supplementary table 1.** List of the antibodies used for WB

| **Type** | **Target** | **Tested species** | **Cat. number** | **Source** | **Made in** | **Clone** | **Dilution** | **MW (kDa)** | **Conjugate** | **Notes** |
| --- | --- | --- | --- | --- | --- | --- | --- | --- | --- | --- |
| Prim. | Trop-2 | Human | AF650 | R&D | goat | polyclonal | 1:250 | 37-55 | none | dil. in 5% BSA |
| Prim. | Trop-2 | Mouse | AF1122 | R&D | goat | polyclonal | 1:500 | 37-55 | none | dil. in 5% BSA |
| Prim. | DSG2 | Human | 32-6100 | TFS | mouse | 6D8 | 1:250 | ~130 | none | dil. in 5% Milk |
| Prim. | DSG2 | Mouse | ab150372 | Abcam | rabbit | EPR6768 | 1:250 | ~130 | none | dil. in 5% Milk |
| Prim. | DSG3 | human | 32-6300 | TFS | mouse | 5G11 | 1:250 | ~130 | none | dil. in 5% Milk |
| Prim. | MMP14 | human, mouse | ab51074 | Abcam | rabbit | EP1264Y | 1:1000 | 66 | none | dil. in 5% Milk |
| Prim. | CLDN1 | human | 13995 | CST | rabbit | D3H7C | 1:1000 | ~20 | none | dil. in 5% BSA |
| Prim. | actin | human, mouse | A5441 | Sigma-Aldrich, Merck | mouse | AC-15 | 1:5000 | 42 | none | dil. in 5% Milk |
| Prim. | tubulin | human, mouse | T9026 | Sigma-Aldrich, Merck | mouse | DM1A | 1:8000 | 50 | none | dil. in 5% Milk |
| Prim. | HSP90 | human | 4874 | CST | rabbit | polyclonal | 1:1000 | 92 | none | dil. in 5% Milk |
| Sec. | Anti-mouse IgG | - | 7076 | CST | horse | polyclonal | 1:4000 | - | HRP | dil. in 5% Milk |
| Sec. | Anti-rabbit IgG | - | 7074 | CST | goat | polyclonal | 1:3000 | - | HRP | dil. in 5% Milk |
| Sec. | Anti-goat IgG | - | A5420 | Sigma-Aldrich, Merck | rabbit | polyclonal | 1:8000 | - | HRP | dil. in 5% Milk |

*Prim. = primary antibody, Sec. = Secondary antibody

**TFS = Thermo Fisher Scientific, CST = Cell Signaling Technology

**Supplementary table 2.** List of the antibodies (primary = prim.), isotype controls (iso) and viability dyes used for flow cytometry

| **Type** | **Target/Name** | **Tested species** | **Cat. number** | **Source** | **Made in** | **Clone** | **Dilution** | **Conjugate** |
| --- | --- | --- | --- | --- | --- | --- | --- | --- |
| Prim. | Trop-2 | Human | FAB650A | R&D | Mouse | 77220 | 1:20 | APC |
| Prim. | DSG2 | Human | 568854 | BD Pharmingen | Mouse | 6D8 | 1:20 | PE |
| Iso | Mouse IgG2A Isotype control | - | IC003A | R&D | Mouse | 20102 | 1:20 | APC |
| Iso | Mouse IgG1, κ Isotype Control | - | 554680 | BD Pharmingen | Mouse | MOPC-21 | 1:20 | PE |
| Viability | LIVE/DEAD™ Fixable Yellow Dead Cell Stain | - | L34959 | TFS | - | - | 1:500 | - |
| Viability | DAPI | - | A4099 | AppliChem GmbH | - | - | 1 mg/ml | - |

**Supplementary table 3.** List of the antibodies used for immunofluorescent microscopy, including proximity ligation assay

| **Type*** | **Target** | **Tested species** | **Cat. number** | **Source**** | **Made in** | **Clone** | **Dilution** | **Conjugate** |
| --- | --- | --- | --- | --- | --- | --- | --- | --- |
| Prim. | Trop-2 | human | AF650 | R&D | goat | polyclonal | 1:100 | - |
| Prim. | DSG1 | human | 32-6000 | TFS | mouse | 27B2 | 1:50 | - |
| Prim. | DSG2 | human | 32-6100 | TFS | mouse | 6D8 | 1:50 | - |
| Prim. | DSG3 | human | 32-6300 | Invitrogen | mouse | 5G11 | 1:50 | - |
| Prim. | V5 tag | human | R960-25 | TSF | mouse | SV5-Pk1 | 1:400 | - |
| Prim. | HA tag | human | 2367 | CST | mouse | 6E2 | 1:100 | - |
| Prim. | Biotin (via streptavidin) | - | S11223 | TFS | - | - | 1:500 | Alexa Fluor™ 488 |
| Sec. | anti-Mouse IgG (H+L) | - | A-21202 | TFS | donkey | polyclonal | 1:1000 | Alexa Fluor™ 488 |
| Sec. | anti-Mouse IgG (H+L) | - | A-21203 | TFS | donkey | polyclonal | 1:1000 | Alexa Fluor™ 594 |
| Sec. | anti-Mouse IgG (H+L) | - | A-31571 | TFS | donkey | polyclonal | 1:1000 | Alexa Fluor™ 647 |
| Sec. | anti-Goat IgG (H+L) | - | A-11058 | TFS | donkey | polyclonal | 1:1000 | Alexa Fluor™ 594 |

*Prim. = primary antibody, Sec. = Secondary antibody

**TFS = Thermo Fisher Scientific, CST = Cell Signaling Technology

**Supplementary table 4.** List of the antibodies for fluorescent immunohistochemistry

| **Type*** | **Target** | **Tested species** | **Cat. number** | **Source**** | **Made in** | **Clone** | **Dilution** | **Conjugate** | **Notes** |
| --- | --- | --- | --- | --- | --- | --- | --- | --- | --- |
| Prim. | Trop-2 | human | AF650 | R&D | goat | polyclonal | 1:50 | unconjucated | citrate buffer pH 6 |
| Prim. | DSG2 | human | MAB947 | R&D | mouse | 141409 | 1:80 | unconjugated | citrate buffer pH 6 |
| Prim. | DSG3 | human | 32-6300 | Invitrogen | mouse | 5G11 | 1:30 | unconjucated | citrate buffer pH 6 |
| Prim. | Ki-67 | human | RBK027 | Zytomed | rabbit | SP6 | 1:500 | unconjugated | citrate buffer pH 9 |
| Sec. | anti-Goat IgG (H+L) | - | A-11058 | TFS | donkey | polyclonal | 1:1000 | Alexa Fluor™ 594 | - |
| Sec. | anti-Mouse IgG (H+L) | - | A-31571 | TFS | donkey | polyclonal | 1:1000 | Alexa Fluor™ 647 | - |
| Sec. | anti-rabbit IgG (H+L) | - | A-31573 | TFS | donkey | polyclonal | 1:1000 | Alexa Fluor™ 647 | - |

*Prim. = primary antibody, Sec. = Secondary antibody

**TFS = Thermo Fisher Scientific

**Supplementary table 5.** List of the antibodies for immunohistochemistry

| **Type*** | **Target** | **Tested species** | **Cat. number** | **Source**** | **Made in** | **Clone** | **Dilution** | **Conjugate** | **Notes** |
| --- | --- | --- | --- | --- | --- | --- | --- | --- | --- |
| Prim. | Trop-2 | human, porcine | 1-898-C100 | Exbio | mouse | TrMab-6 | 1:100 | unconjucated | citrate buffer pH 6 |
| Prim. | DSG1 | human, porcine | MAB944 | R&D | mouse | 129204 | 1:100 | unconjugated | citrate buffer pH 6 |
| Prim. | DSG2 | human, porcine | MAB947 | R&D | mouse | 141409 | 1:80 | unconjucated | citrate buffer pH 6 |
| Prim. | DSG3 | human, procine | 32-6300 | TFS | mouse | 5G11 | 1:30 | unconjugated | citrate buffer pH 6 |
| Prim. | EpCAM | human, porcine | 11-581-C025 | Exbio | mouse | VU-1D9 | 1:250 | unconjucated | citrate buffer pH 6 |
| Prim. | Ki-67 | human, porcine | RBK027 | Zytomed | rabbit | SP6 | 1:500 | unconjugated | phosphate buffer pH 9 |
| Prim. | CLDN1 | human, mouse | ab307692 | Abcam | rabbit | EPR25359-48 | 1:100 | unconjugated | phosphate buffer pH 9 |
| Sec. | EnVision+ System- HRP  Labelled Polymer  Anti-Mouse | - | K4001 | Dako | goat | - | RU | HRP | - |
| Sec. | EnVision+ System- HRP  Labelled Polymer  Anti-Rabbit | - | K4003 | Dako | goat | - | RU | HRP | - |

*Prim. = primary antibody, Sec. = Secondary antibody

**TFS = Thermo Fisher Scientific

*** RU = Ready to use
